# Supplementary material for: Liver gene therapy with intein‐mediated F8 trans‐splicing corrects mouse haemophilia A
Source: PubMed Central journal article supplement (PMC9174883; doi:10.15252/emmm.202115199), 2022-05-02
Supplement: EMMM-14-e15199-s004.pdf [file EMMM-14-e15199-s004.pdf]

## **Appendix**

The appendix contains Appendix Table S1 which includes the statistical tests used and p-values

|                         |
|-------------------------|
| <b>Table of content</b> |
|-------------------------|

Appendix Table S1

**Appendix Table S1**

**Figure 2C The Kruskal-Wallis test followed by the posthoc analysis:  
Nemenyi's All-Pairs Rank Comparison Test.**

**The Kruskal-Wallis test p value = 2.88e-05. Post-hoc p values are as follows:**

| Group 1      | Group 2   | p value    |
|--------------|-----------|------------|
| wild-type F8 | Neg       | 0.8        |
| N6           | Neg       | 0.00034878 |
| SQ           | Neg       | 0.09       |
| V3           | Neg       | 0.002      |
| N6           | wild-type | 0.003      |
| SQ           | wild-type | 0.46       |
| V3           | wild-type | 0.02       |
| SQ           | N6        | 0.3        |
| V3           | N6        | 0.9        |
| V3           | SQ        | 0.6        |

**Figure 3C The Kruskal-Wallis test p value= 0.013.**

**P value between different groups as follow:**

| Group 1     | Group 2     | p value |
|-------------|-------------|---------|
| I           | II          | 0.5     |
| I           | I N-int B   | 0.6     |
| II          | I+II (Het)  | 0.7     |
| II          | N6 intein   | 0.09    |
| II          | Neg         | 0.06    |
| I           | I (N int-B) | 0.3     |
| II          | I+II (Het)  | 0.4     |
| II          | I+II        | 0.02    |
| II          | Neg         | 0.2     |
| I (N int-B) | I+II (Het)  | 0.8     |
| I (N int-B) | I+II        | 0.2     |
| I (N int-B) | neg         | 0.02    |
| I+II (Het)  | I+II        | 0.1     |
| I+II (Het)  | Neg         | 0.03    |
| I+II        | Neg         | 0.0003  |

**Figure 4C The Kruskal-Wallis test has been used; p value is 0.027.**

**P value between different groups as follow:**

| Group 1 | Group 2    | p value |
|---------|------------|---------|
| I       | II         | 0.5     |
| I       | Codop II   | 0.9     |
| I       | Codop I    | 0.9     |
| II      | Codop I+II | 0.007   |
| II      | I+II       | 0.03    |
| II      | Neg        | 0.4     |
| I       | Codop II   | 0.6     |
| I       | Codop I    | 0.5     |
| I       | Codop I+II | 0.03    |
| I       | I+II       | 0.1     |
| I       | Neg        | 0.8     |

|            |            |       |
|------------|------------|-------|
| II Codop   | Codop I+II | 0.008 |
| II Codop   | I+II       | 0.04  |
| II Codop   | Neg        | 0.4   |
| I Codop    | Codop I+II | 0.005 |
| I Codop    | I+II       | 0.03  |
| I Codop    | Neg        | 0.4   |
| Codop I+II | I+II       | 0.5   |
| Codop I+II | Neg        | 0.056 |

**Figure 5B The Kruskal-Wallis test has been used at the baseline; p value is 0.0001.**

**P value between different groups are as follows:**

| Group 1        | Group 2        | p value |
|----------------|----------------|---------|
| wild-type      | CodopN6 intein | 0.0016  |
| wild-type      | CodopV3        | 0.0012  |
| wild-type      | N6 intein      | 0.0016  |
| CodopN6 intein | CodopV3        | 1       |
| CodopN6 intein | N6 intein      | 1       |
| CodopN6 intein | CodopV3        | 0.078   |

**Figure 5B at 4wpi the One-way Anova has been used; p value = 0.056.**

**P value between different groups are as follows:**

| Group 1        | Group 2   | p value |
|----------------|-----------|---------|
| CodopN6 intein | CodopV3   | 0.078   |
| CodopN6 intein | N6 intein | 0.95    |
| CodopV3        | N6 intein | 0.138   |

**Figure 5B 8wpi the Kruskal-Wallis test has been used; p value is 0.68.**

**P value between different groups are as follows:**

| Group 1        | Group 2   | p value |
|----------------|-----------|---------|
| CodopN6 intein | CodopV3   | 1       |
| CodopN6 intein | N6 intein | 1       |
| CodopV3        | N6 intein | 1       |

**Figure 5B at 12wpi the Kruskal-Wallis test has been used; p value is 0.45.**

**P value between different groups are as follows:**

| Group 1        | Group 2   | p value |
|----------------|-----------|---------|
| CodopN6 intein | CodopV3   | 0.84    |
| CodopN6 intein | N6 intein | 1       |
| CodopV3        | N6 intein | 0.94    |

**Figure 5B at 16wpi the Kruskal-Wallis test has been used; p value is 0.58.**

**P value between different groups are as follows:**

| Group 1        | Group 2   | p value |
|----------------|-----------|---------|
| CodopN6 intein | N6 intein | 0.90    |

**Figure 5C The Kruskal-Wallis test has been used; p value is <0.0001.**

**P value between different groups are as follows:**

| Group 1        | Group 2        | p value |
|----------------|----------------|---------|
| baseline       | CodopN6 intein | 0.01    |
| baseline       | N6 intein      | 0.008   |
| baseline       | CodopV3        | 0.7     |
| baseline       | wild-type      | 0.002   |
| CodopN6 intein | CodopV3        | 0.45    |
| CodopN6 intein | N6 intein      | 1       |

|                |                |     |
|----------------|----------------|-----|
| CodopN6 intein | wild-type      | 1   |
| CodopV3        | CodopN6 intein | 1   |
| CodopV3        | wild-type      | 0.5 |

**Figure 5D Anova test has been used; p value is =0.11.**

**P value between different groups are as follows:**

| Group 1        | Group 2   | p value |
|----------------|-----------|---------|
| CodopN6 intein | CodopV3   | 0.724   |
| CodopN6 intein | K.O.      | 0.081   |
| CodopN6 intein | N6 intein | 0.926   |
| CodopV3        | K.O.      | 0.492   |
| CodopV3        | N6 intein | 0.978   |
| K.O.           | N6 intein | 0.294   |

**Figure 5E Anova test has been used; p value is =0.39.**

**P value between different groups are as follows:**

| Group 1        | Group 2   | p value |
|----------------|-----------|---------|
| CodopN6 intein | CodopV3   | 0.161   |
| CodopN6 intein | K.O.      | 0.085   |
| CodopN6 intein | N6 intein | 0.265   |
| CodopV3        | K.O.      | 0.986   |
| CodopV3        | N6 intein | 0.991   |
| K.O.           | N6 intein | 0.920   |

**Figure 6A Paired T-test has been used**

**P value between different groups are as follows:**

| Test          | Group          | p value |
|---------------|----------------|---------|
| Paired T-test | CodopV3        | 0.00072 |
| Paired T-test | N6 intein      | 0.033   |
| Paired T-test | CodopN6 intein | 0.002   |

**Figure 6C The Kruskal-Wallis test has been used; p value is 0.01140.**

**P value between different groups are as follows:**

| Group | Group 1 | Group 2 | p value    |
|-------|---------|---------|------------|
| IP10% | 0       | 4       | 0.01623160 |
|       | 0       | 8       | 0.04917713 |
|       | 0       | 16      | 0.01623160 |
|       | 4       | 8       | 0.64377442 |
|       | 4       | 16      | 0.93665725 |
|       | 8       | 16      | 0.64377442 |

**Figure 6C The Kruskal-Wallis test has been used; p value is 0.03650.**

**P value between different groups are as follows:**

| Group     | Group 1 | Group 2 | p value    |
|-----------|---------|---------|------------|
| eotaxin % | 0       | 4       | 0.09686514 |
|           | 0       | 8       | 0.06366775 |
|           | 0       | 16      | 0.04957186 |
|           | 4       | 8       | 0.84251318 |
|           | 4       | 16      | 0.84251318 |
|           | 8       | 16      | 0.84251318 |
